# Supplementary figures and images for: A Randomized Trial of Spiritual Assessment of Outpatients With Schizophrenia: Patients' and Clinicians' Experience
Source: Atypon-hosted journal article supplement (doi:10.1176/ps.62.1.pss6201_0079), 2011-01-01

## Flow of participants through the study

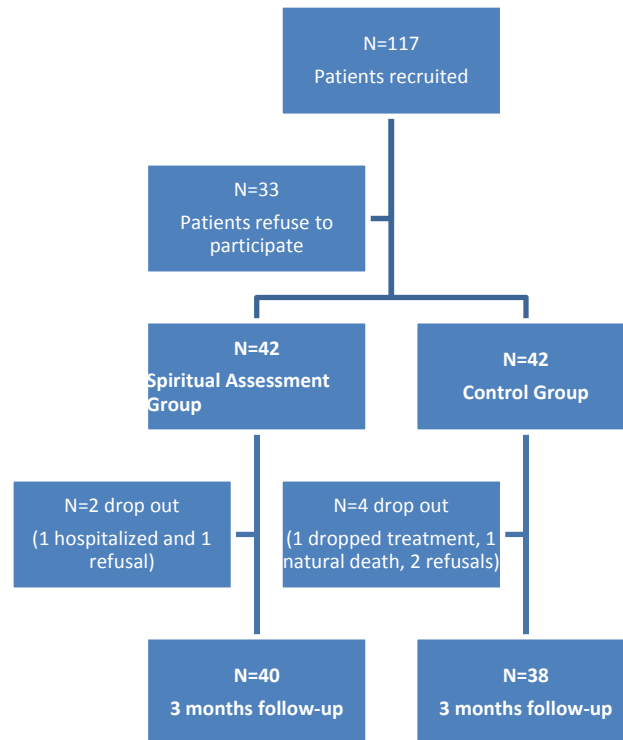

Supplement: Huguelet DS flow.pdf [file Huguelet%20DS%20flow.pdf]
